# Supplementary material for: Mixed-ligand strategy for synthesizing water-soluble chiral gold clusters with phosphine ligands
Source: Royal Society of Chemistry journal article supplement (doi:10.1039/d2cp04021b), 2022-01-01
Supplement: d2cp04021b1.pdf [file d2cp04021b1.pdf]

Electronic Supplementary Information (ESI)

## Mixed-ligand strategy for synthesizing water-soluble chiral gold clusters with phosphine ligands

Hiyori Ajioka, Mayuko Komada, and Hiroshi Yao\*

*Division of Chemistry for Materials, Graduate School of Engineering, Mie University, 1577  
Kurimamachiya-cho, Tsu, Mie 514-8507, Japan*

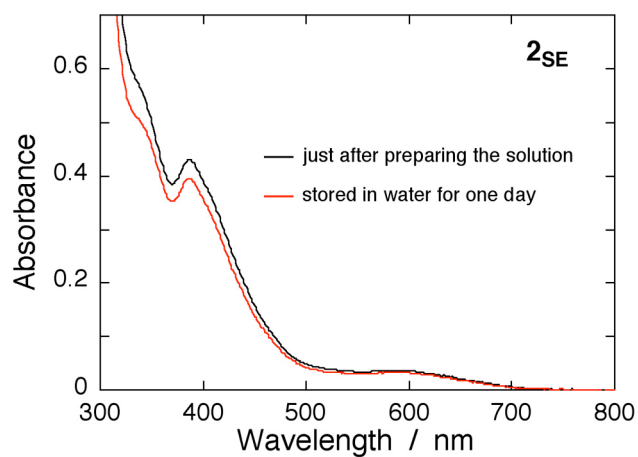

**Fig. S1.** Stability of compound **2<sub>SE</sub>** in aqueous solution.

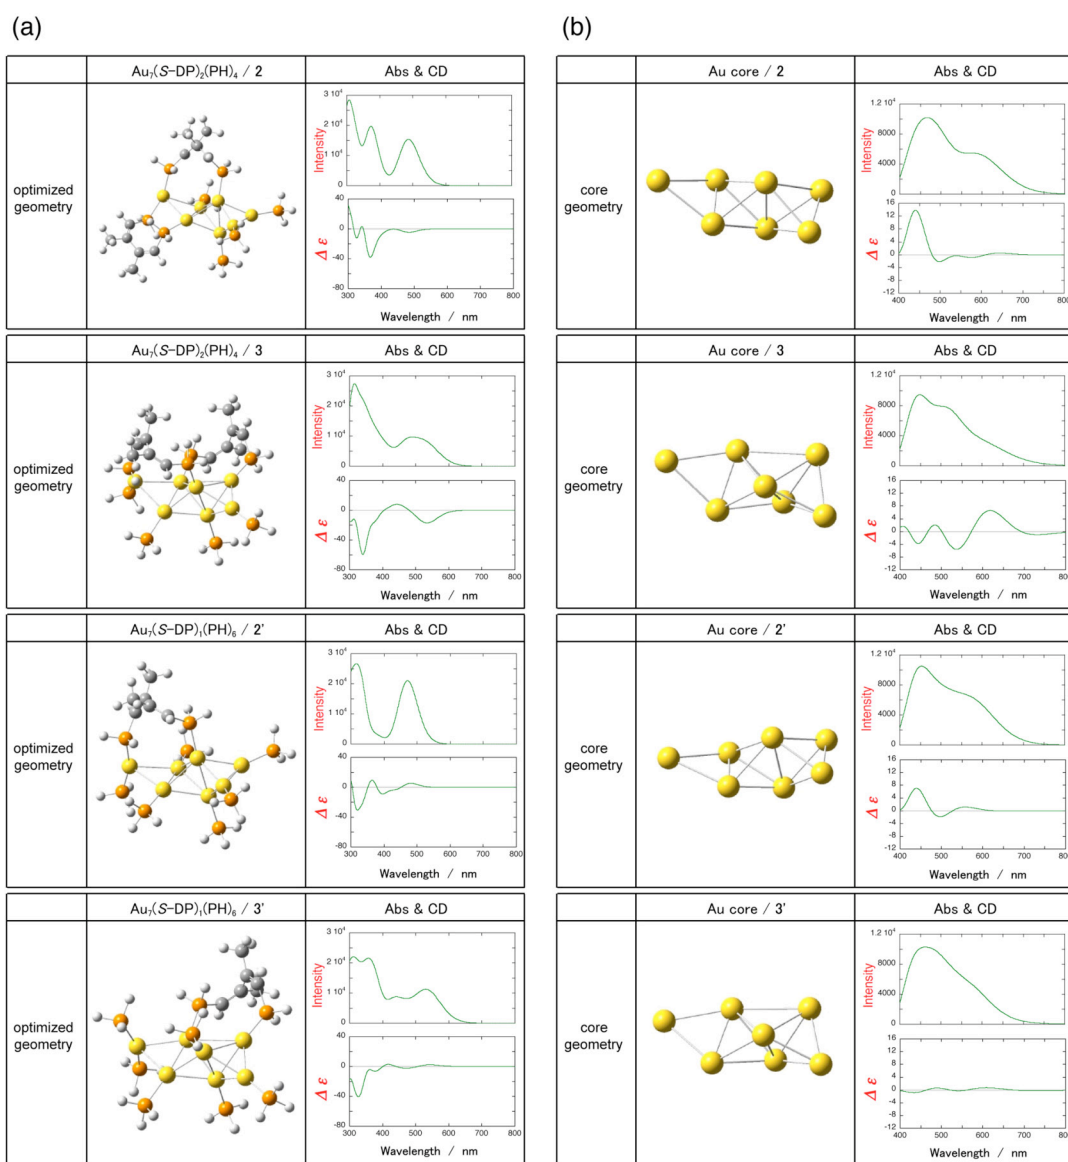

**Fig. S2.** (a) Possible configurational isomers of  $[\text{Au}_7(\text{S-DP})_2(\text{PH})_4]$  and  $[\text{Au}_7(\text{S-DP})_1(\text{PH})_6]$  together with the corresponding absorption and CD spectra. (b) Extracted core geometries, and their absorption and CD spectra.
